# Supplementary material
Source: PubMed Central journal article supplement (PMC5729569)
Supplement: npp2017194x1.pdf [file npp2017194x1.pdf]

# SUPPLEMENTARY FIGURES

Supplemental Figure 1A

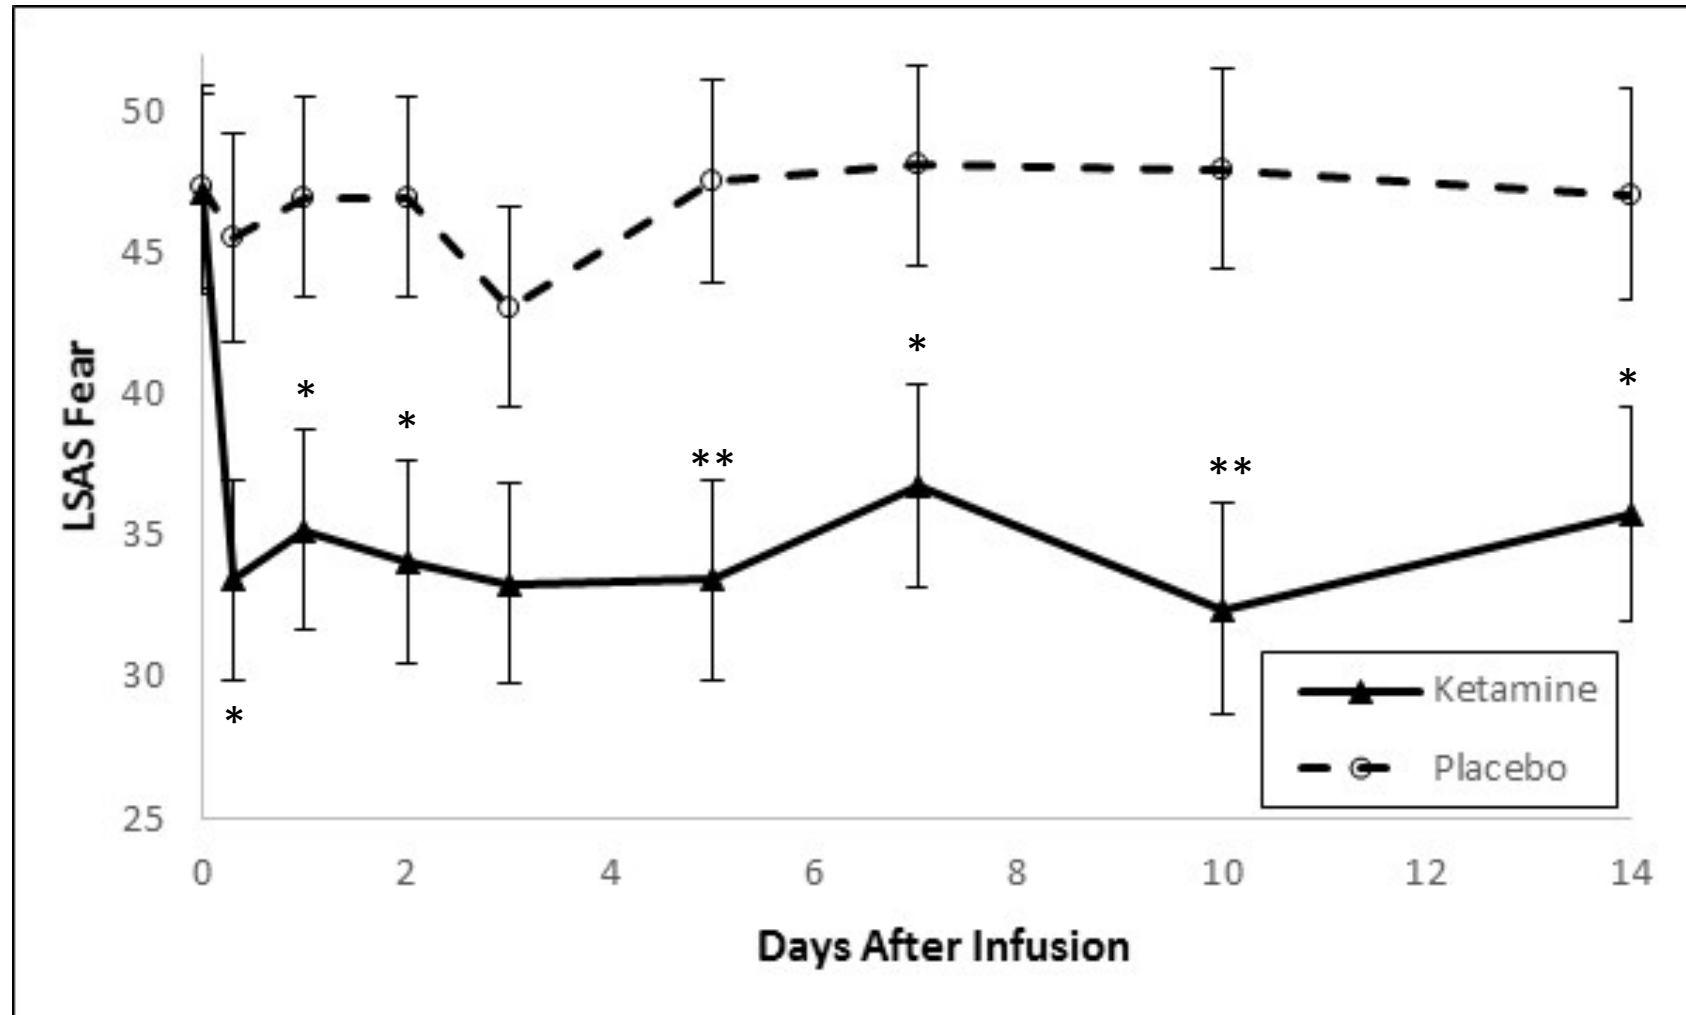

\* p < 0.05, \*\* p < 0.01

Supplemental Figure 1B

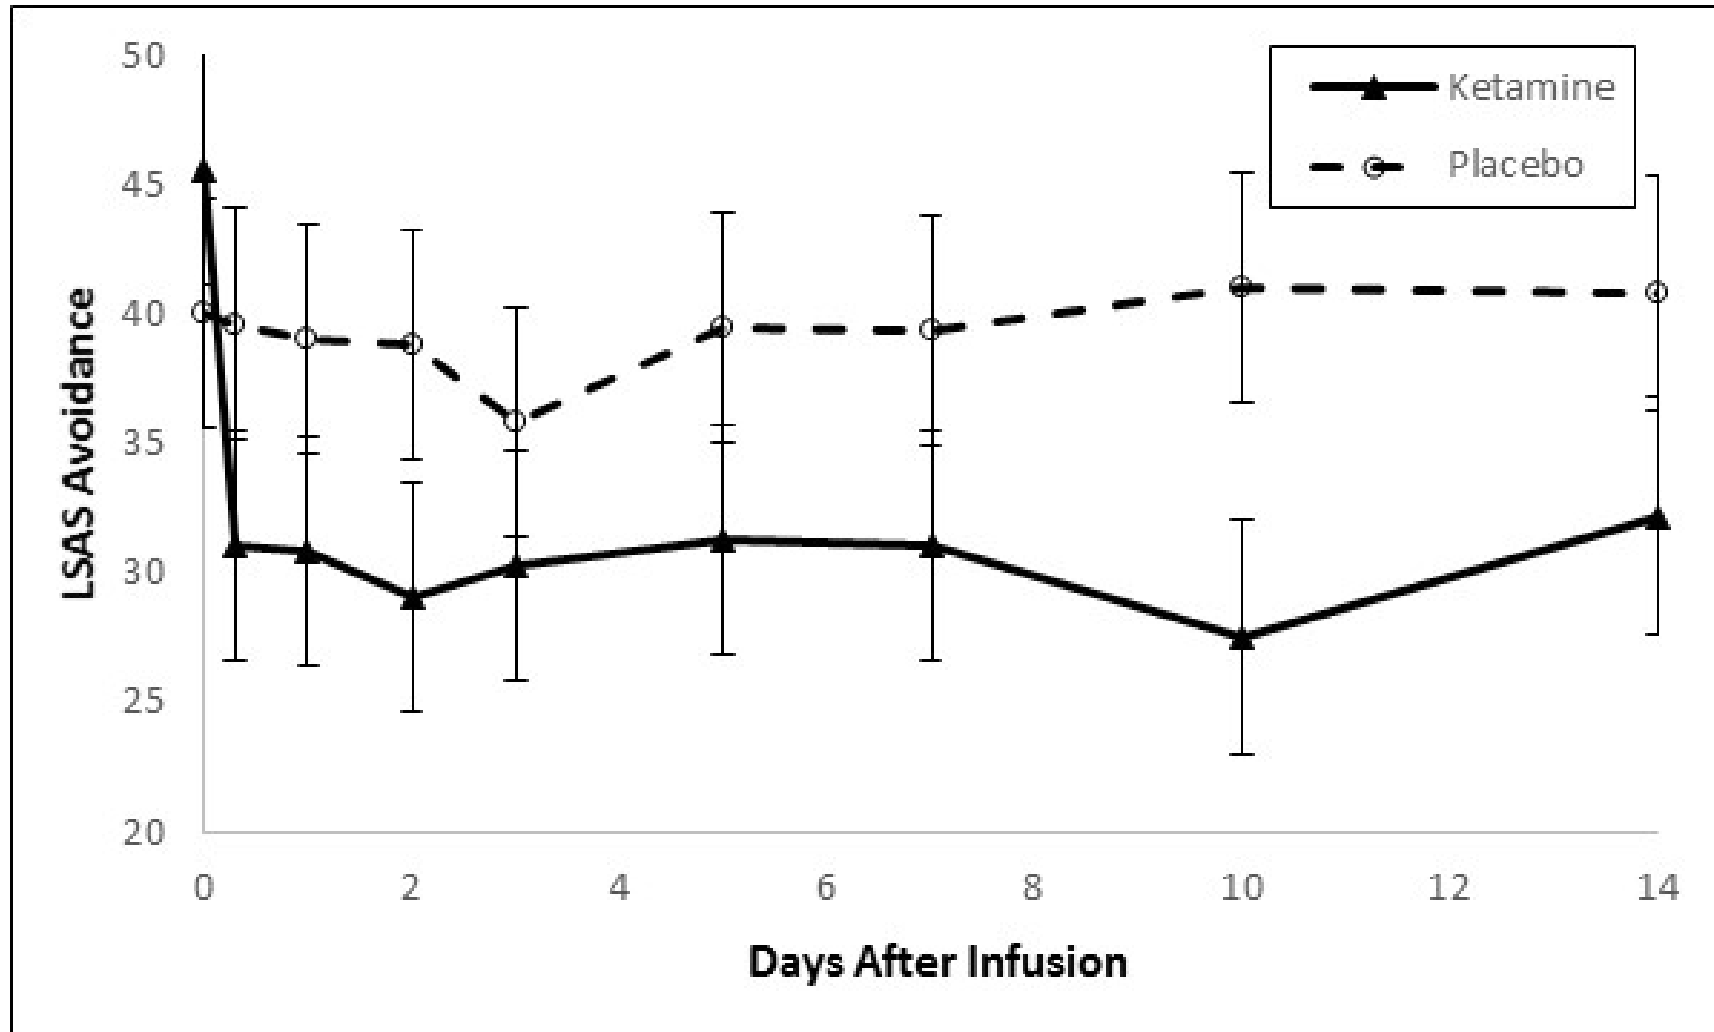

\*  $p < 0.05$ , \*\*  $p < 0.01$

Supplemental Figure 2A

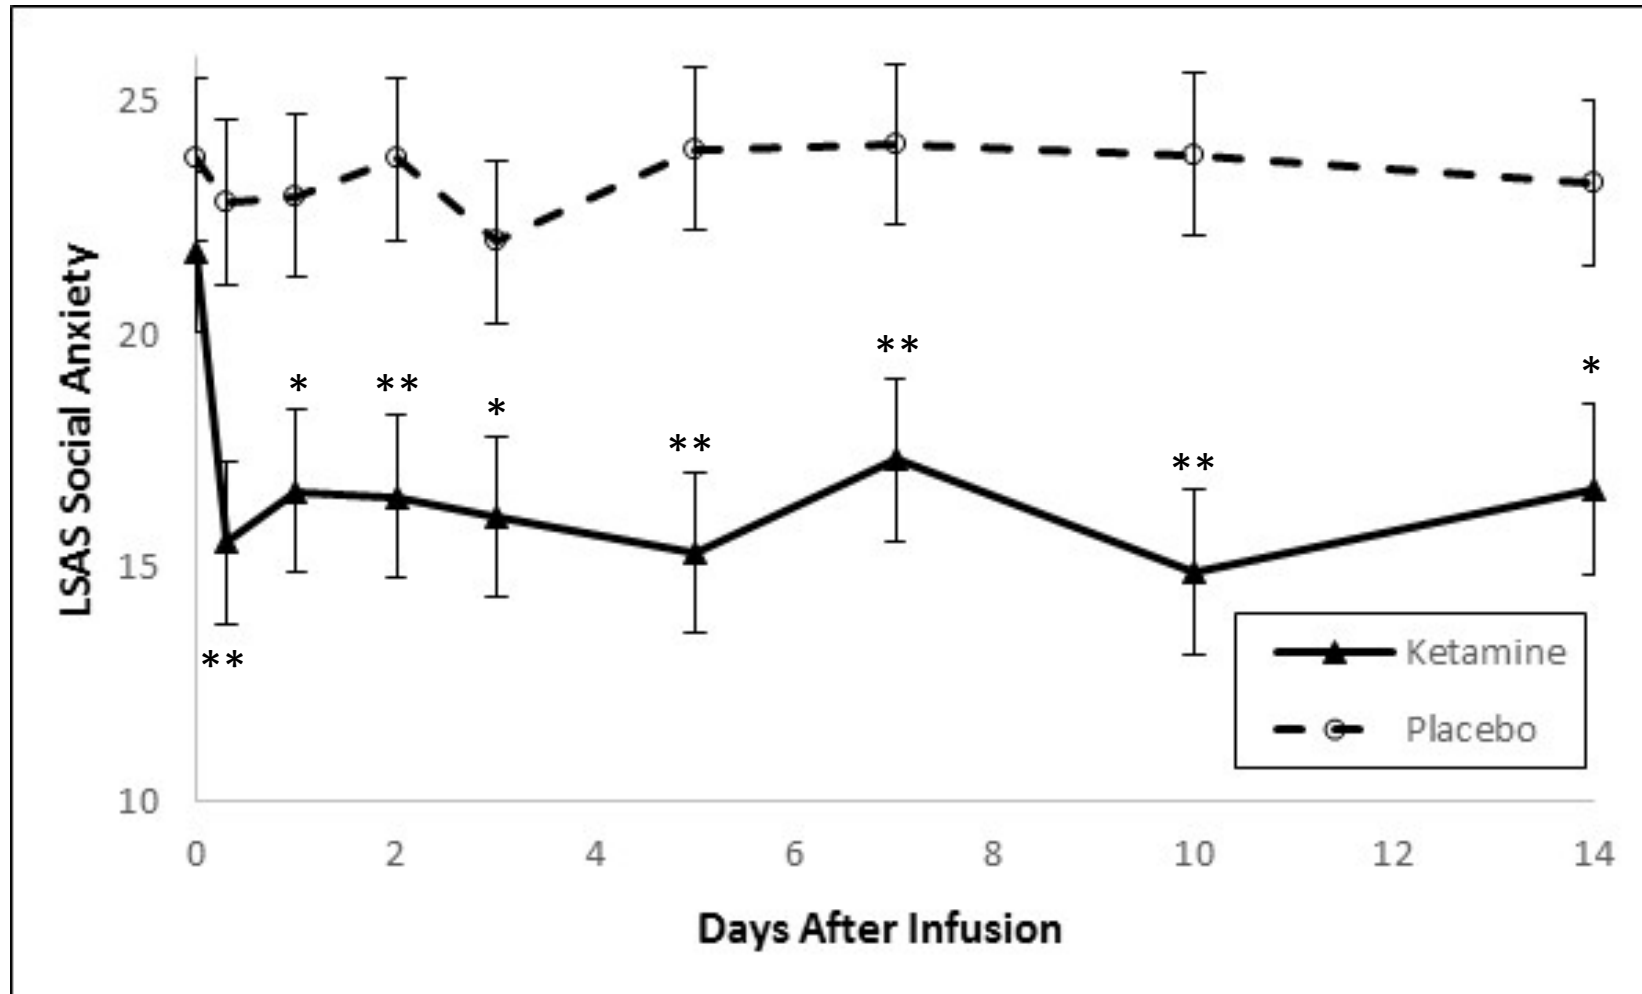

\* p < 0.05, \*\* p < 0.01

Supplemental Figure 2B

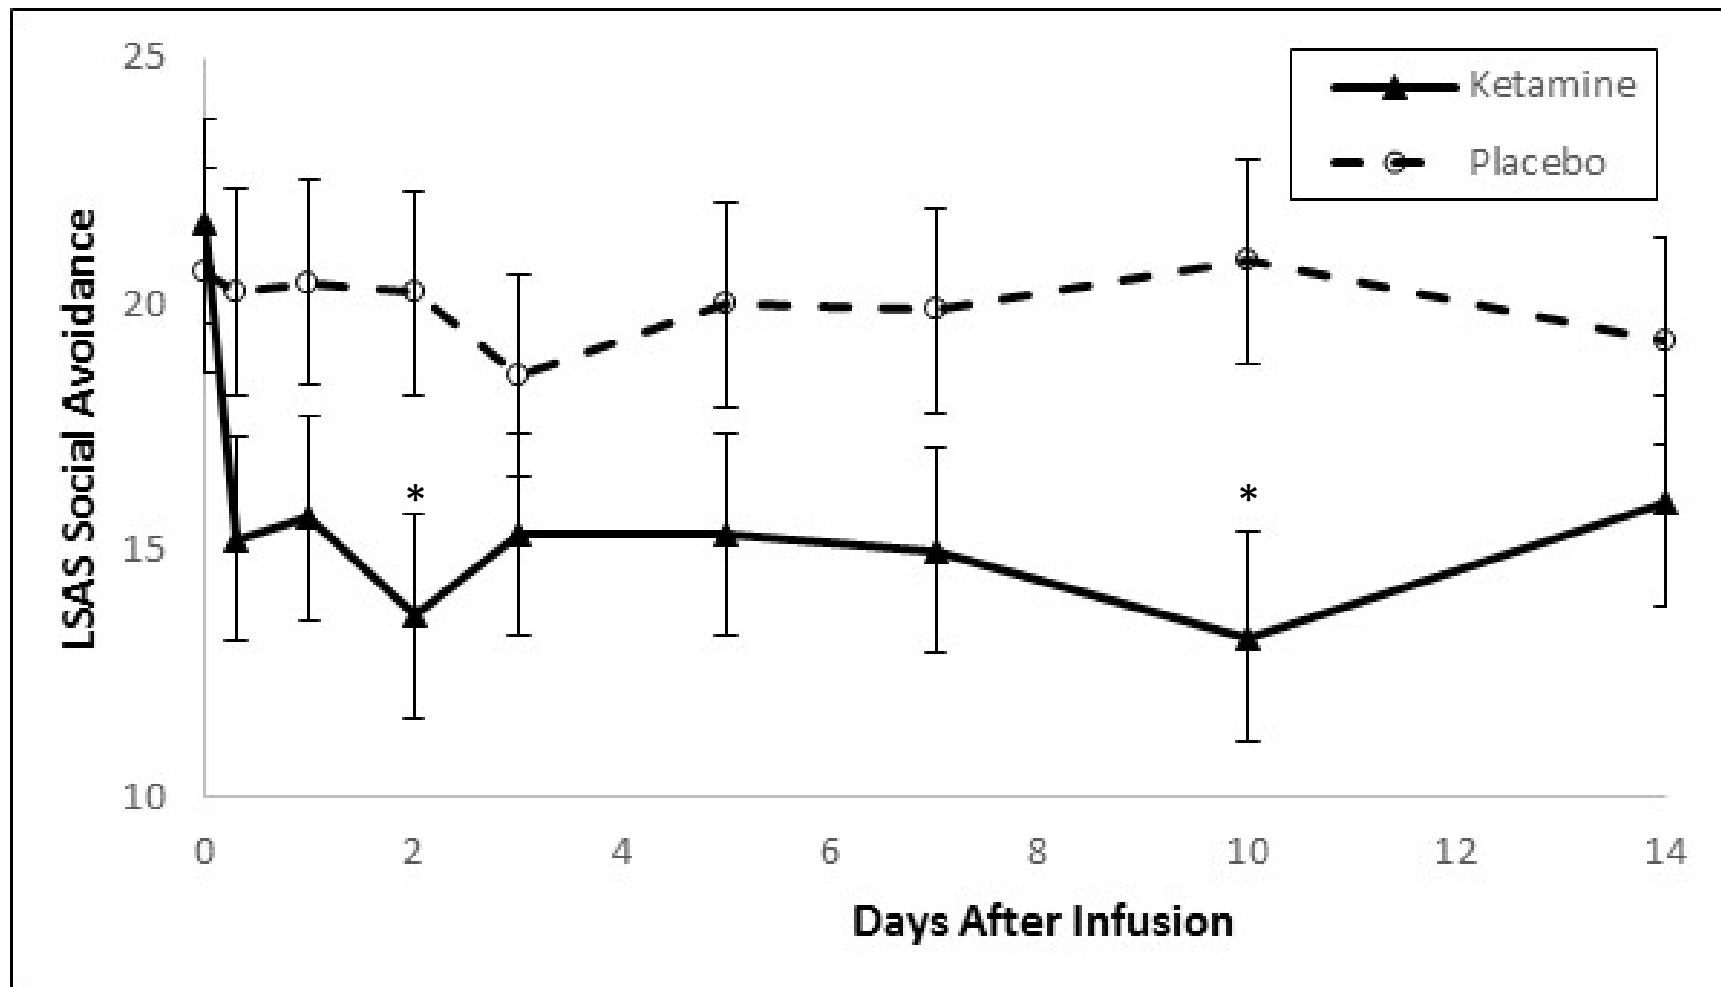

\* p < 0.05, \*\* p < 0.01

Supplemental Figure 2C

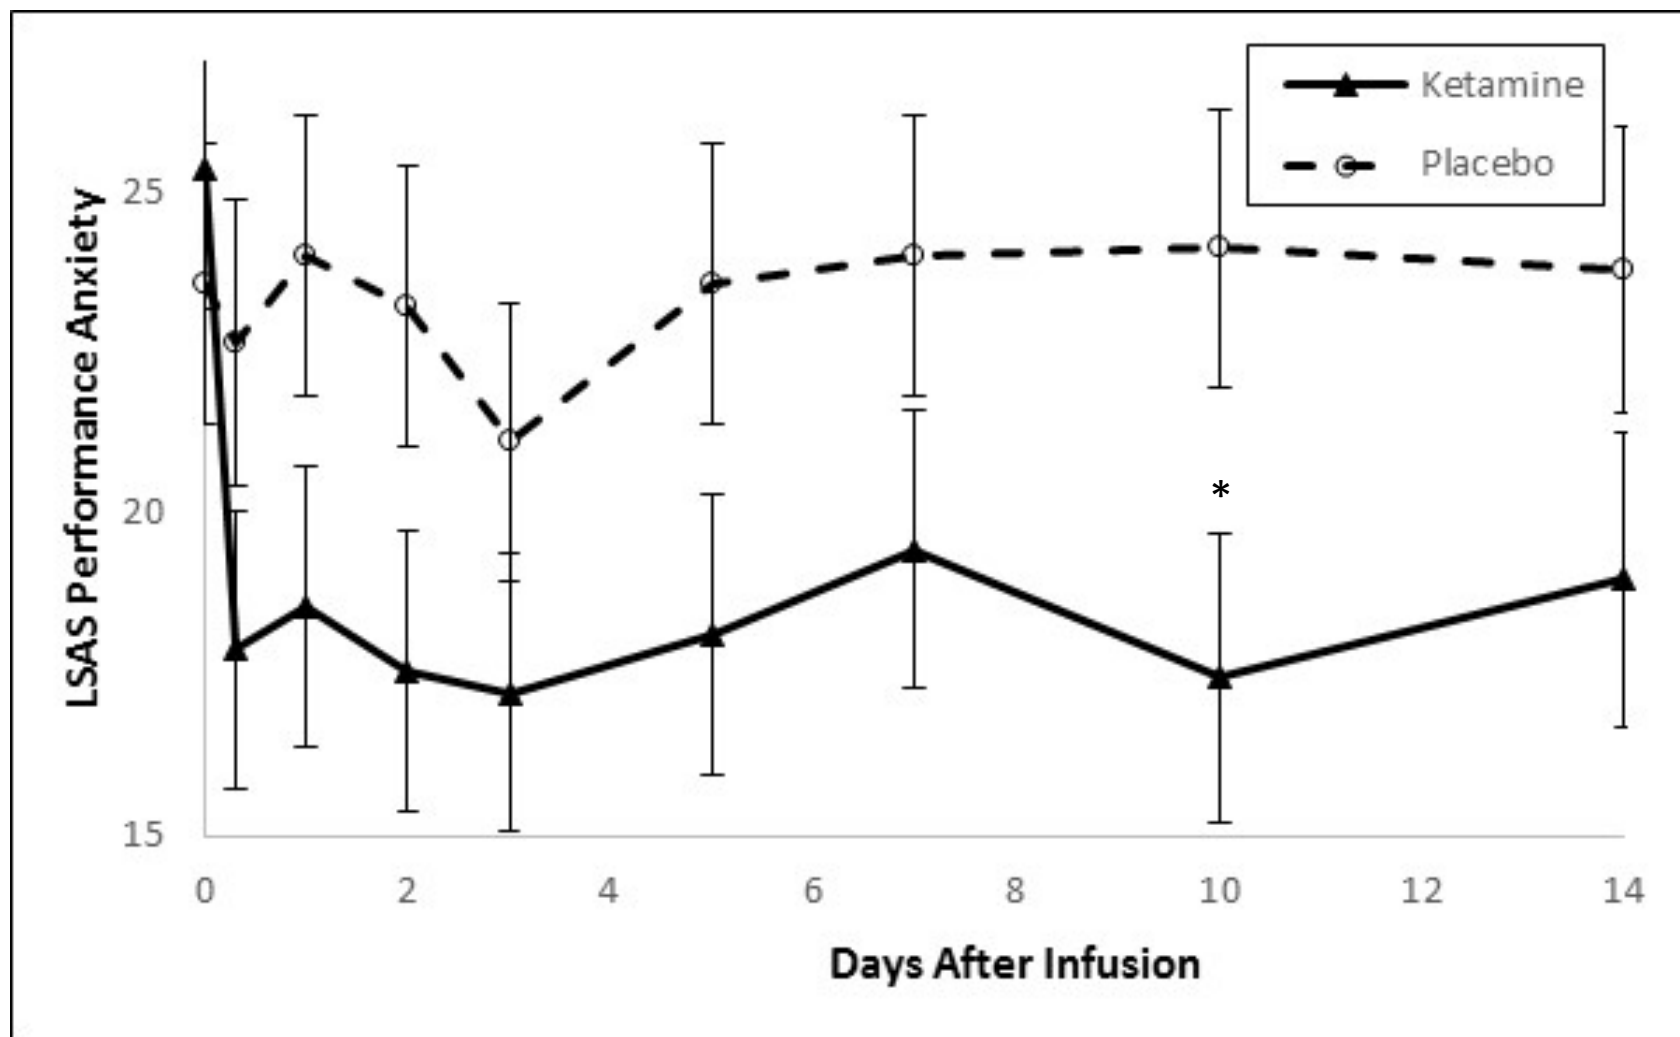

\*  $p < 0.05$ , \*\*  $p < 0.01$

Supplemental Figure 2D

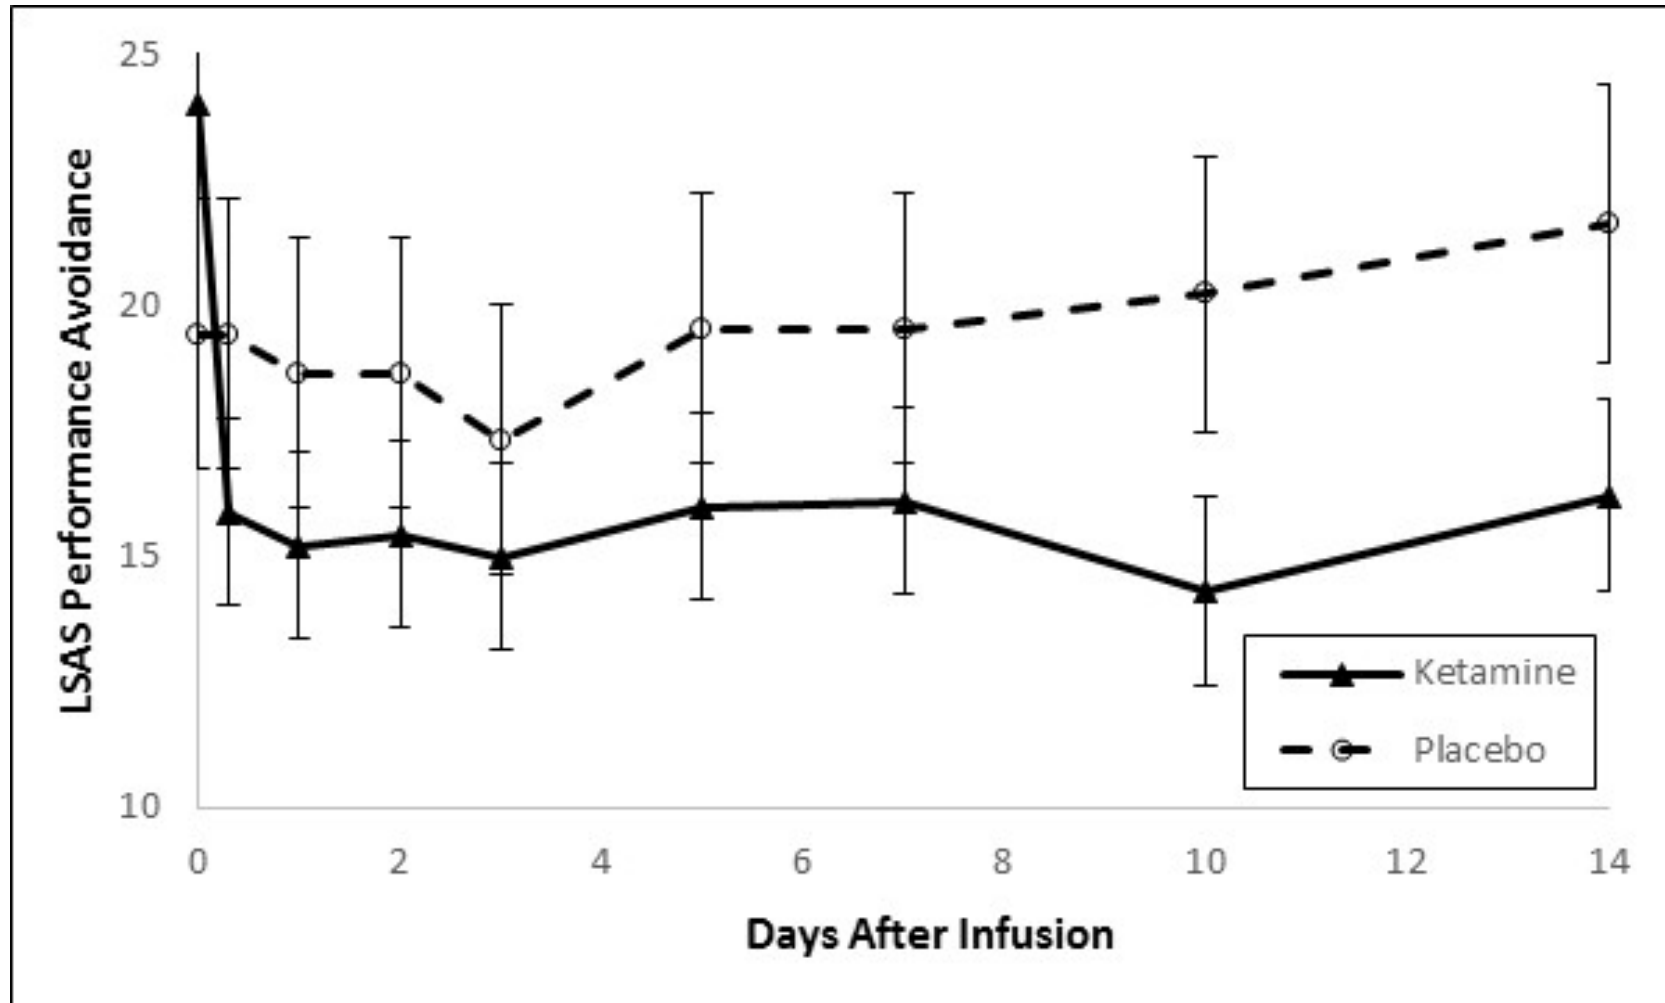

\*  $p < 0.05$ , \*\*  $p < 0.01$

Supplemental Figure 3

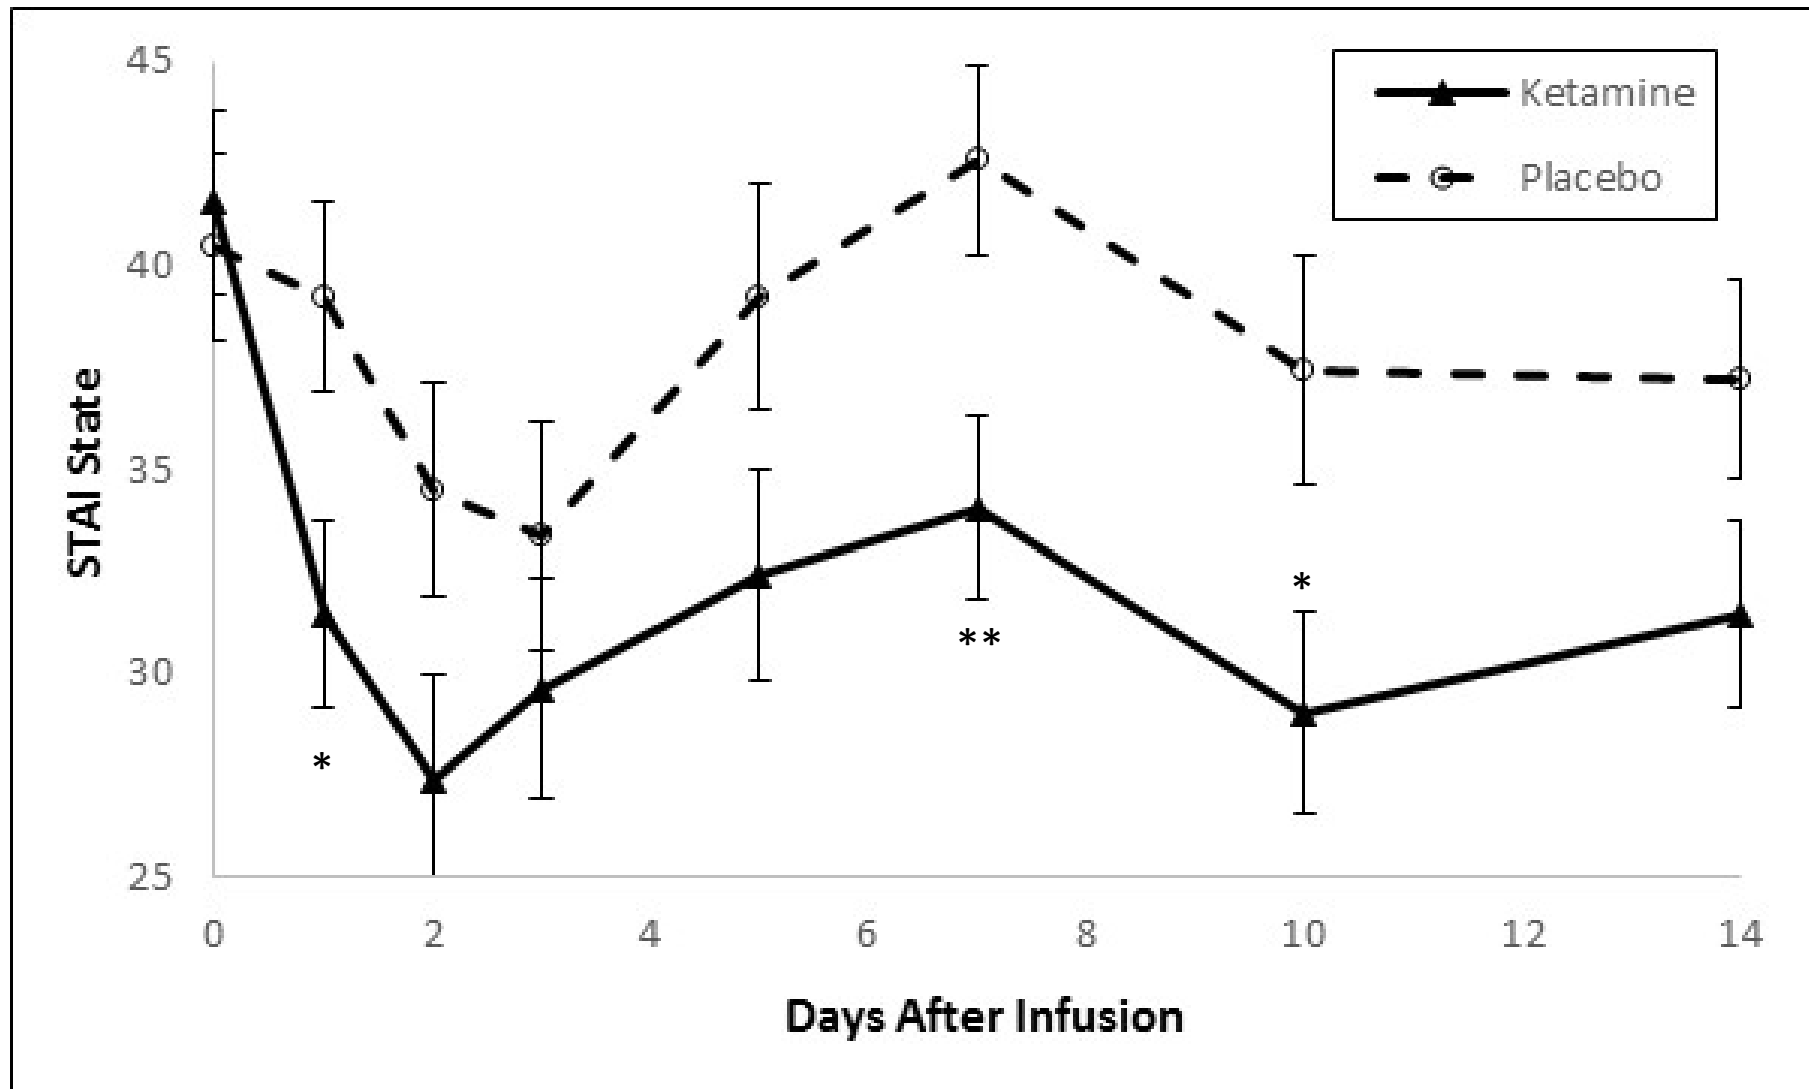

\* p < 0.05, \*\* p < 0.01



Supplemental Figure 4

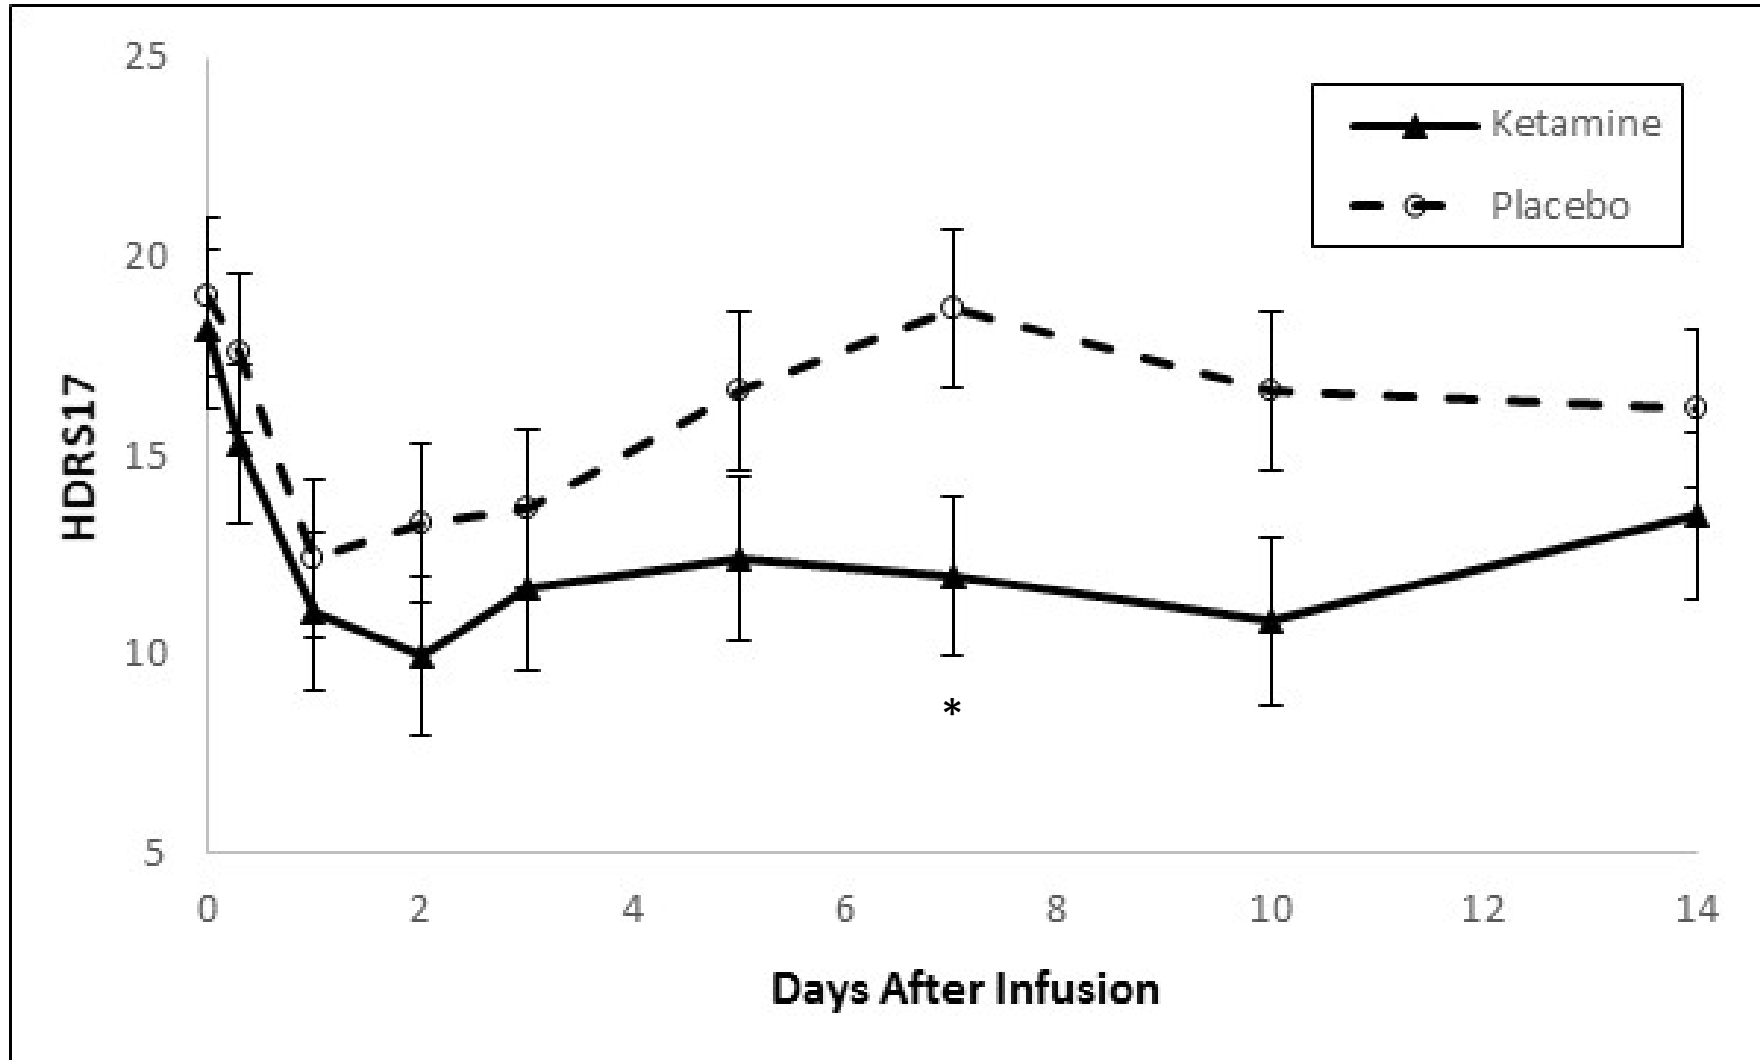

\*  $p < 0.05$ , \*\*  $p < 0.01$
